# Supplementary material
Source: PubMed Central journal article supplement (PMC2734162)
Supplement: gan079_1.pdf [file gan079_1.pdf]

**SUPPLEMENTARY FIGURE LEGENDS**

Fig. S1: A) L $\beta$ T2 cells were transfected with 450 ng/well of the indicated *LHB*-luc reporters and treated for 6 h with  $10^{-7}$  M GNRH1. Fold induction by GNRH1 for each reporter is indicated at the left of the graph. Bars with different symbols differ significantly. N=3 for all treatments. B) The 0.2 kb *LHB*-luc construct was transfected in L $\beta$ T2 cells as above. Cells were treated with  $10^{-8}$  (closed circles),  $10^{-7}$  (open circles) or  $10^{-6}$  M (closed triangles) GNRH1 for 2, 4, 8 or 24 hours. N=2 for all treatments. Experiments were repeated three or more times with similar results each time.

Fig. S2: A) L $\beta$ T2 cells were transfected as in Fig. 2B. After overnight starvation in serum-free DMEM, cells were pre-treated with  $5 \times 10^{-6}$  M of the MEK inhibitor U0126,  $10^{-5}$  M of the p38 inhibitor SB202190 or  $2.5 \times 10^{-5}$  M of the JNK inhibitor SP600125 for 30 min followed by treatment with  $10^{-7}$  M GNRH1 for 6 h. The fold induction by GNRH1 is indicated at the bottom of the graph. B) L $\beta$ T2 cells were transfected with 450 ng/well 0.2 kb *LHB*-luc reporter and 200 ng/well of constitutively active Raf1 (Raf-CAAX) and/or ca-MKK6 vectors. Bars with different symbols differ significantly. N=3 for all treatments.

Fig. S3: CHO cells were transfected with WT or siRNA-resistant (Res.) forms of Flag-tagged EGR1 (A), SF1 (B) or Pitx1 (C), with  $10^{-8}$  M control, *Egr1*, *Sfl* or *Pitx1* siRNAs or 1X siRNA buffer. Whole-cell lysates were collected and subjected to anti-Flag western blot analyses. Arrowhead and asterisk in panel A indicate specific and non-specific bands, respectively.

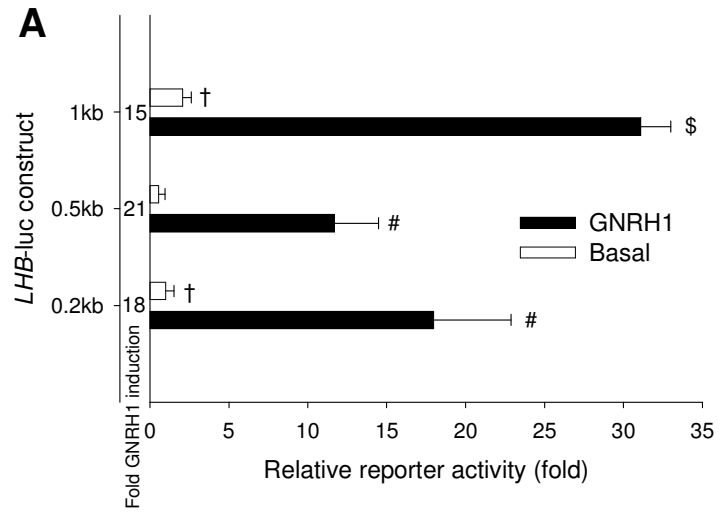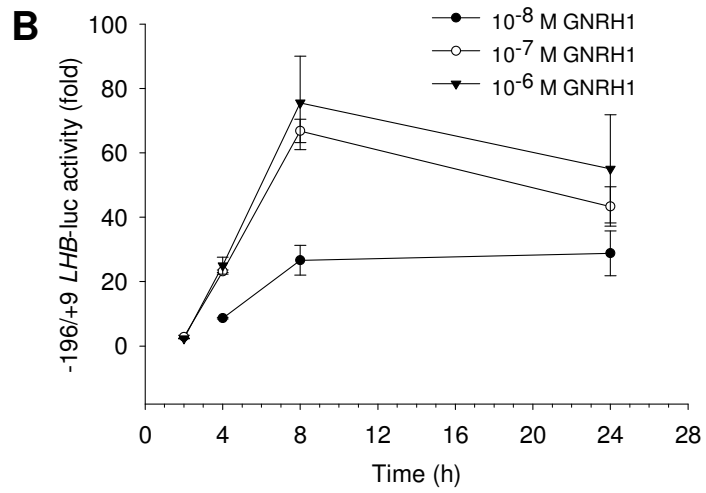

Fig. S1

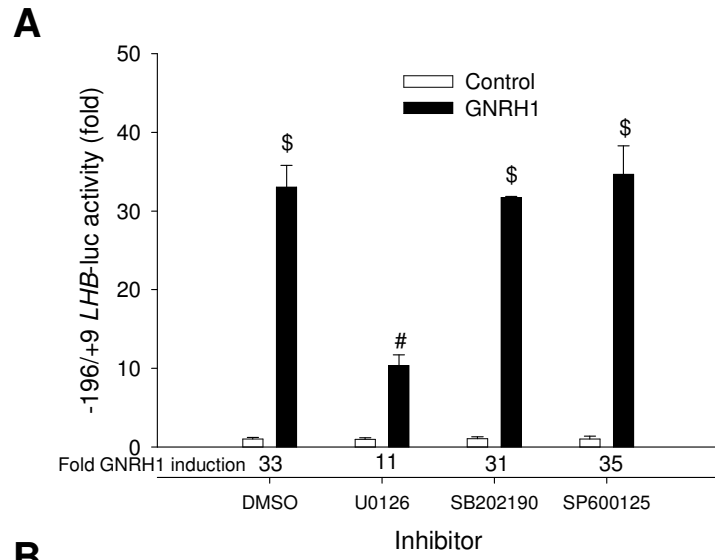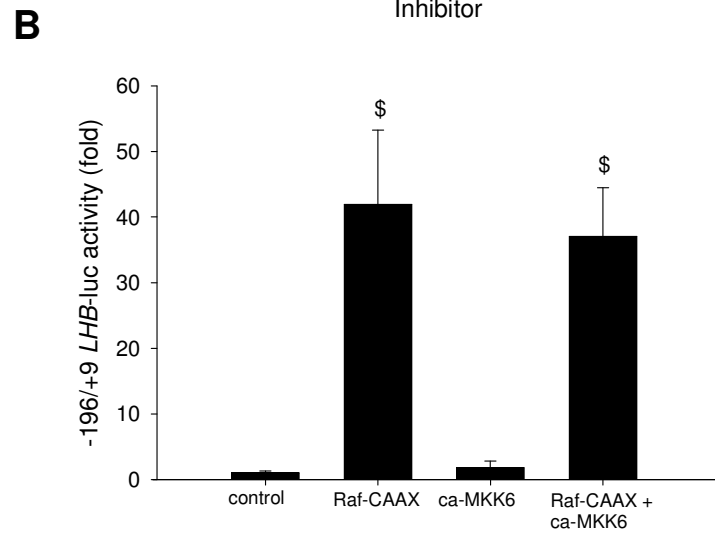

Fig. S2

**A**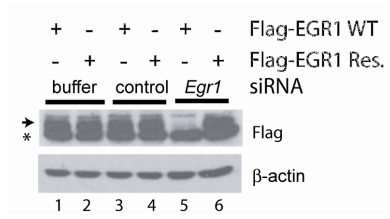**B**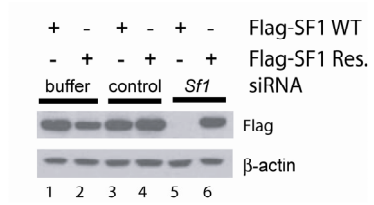**C**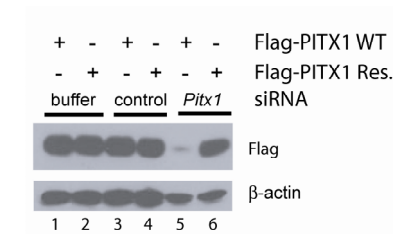**Fig. S3**
